# Supplementary material for: Optimization of drop-casting parameters for fabrication of n-type accumulation mode organic electrochemical transistors (OECTs) using gNDI-Br 2
Source: Royal Society of Chemistry journal article supplement (doi:10.1039/d5ma01045d), 2025-12-02
Supplement: d5ma01045d1.pdf [file d5ma01045d1.pdf]

## Supporting Information

# Optimization of Drop-casting Parameters for Fabrication of n-type Accumulation Mode Organic Electrochemical Transistors (OECTs) Using gNDI-Br<sub>2</sub>

*Seongdae Kang<sup>1</sup>, Jiaxin Fan<sup>2</sup>, Manisha Gupta<sup>2, \*</sup>*

<sup>1</sup>Department of Chemical and Materials Engineering, University of Alberta, Edmonton, Alberta, T6G 1H9, Canada.

<sup>2</sup>Department of Electrical and Computer Engineering, University of Alberta, Edmonton, Alberta, T6G 1H9, Canada.

\* Corresponding author email address: [mgupta1@ualberta.ca](mailto:mgupta1@ualberta.ca)

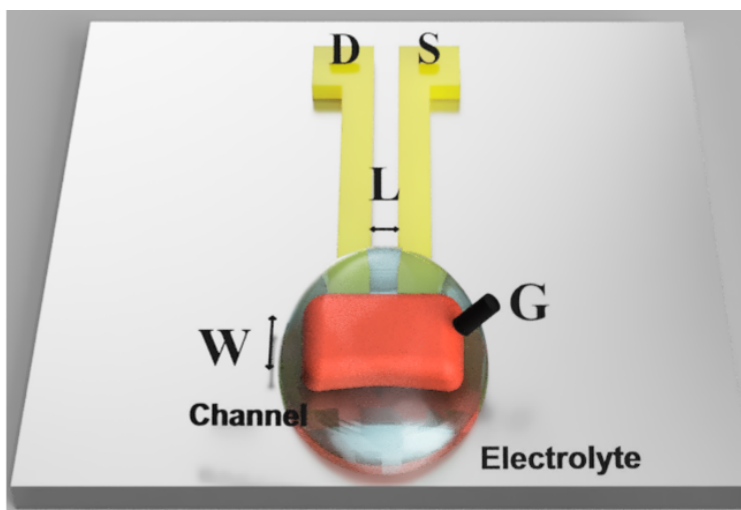

Figure. S1. Schematic image of an OECT. W and L represent the width and length of the channel, while S, D, and G denote the source, drain, and gate electrodes of the OECT.

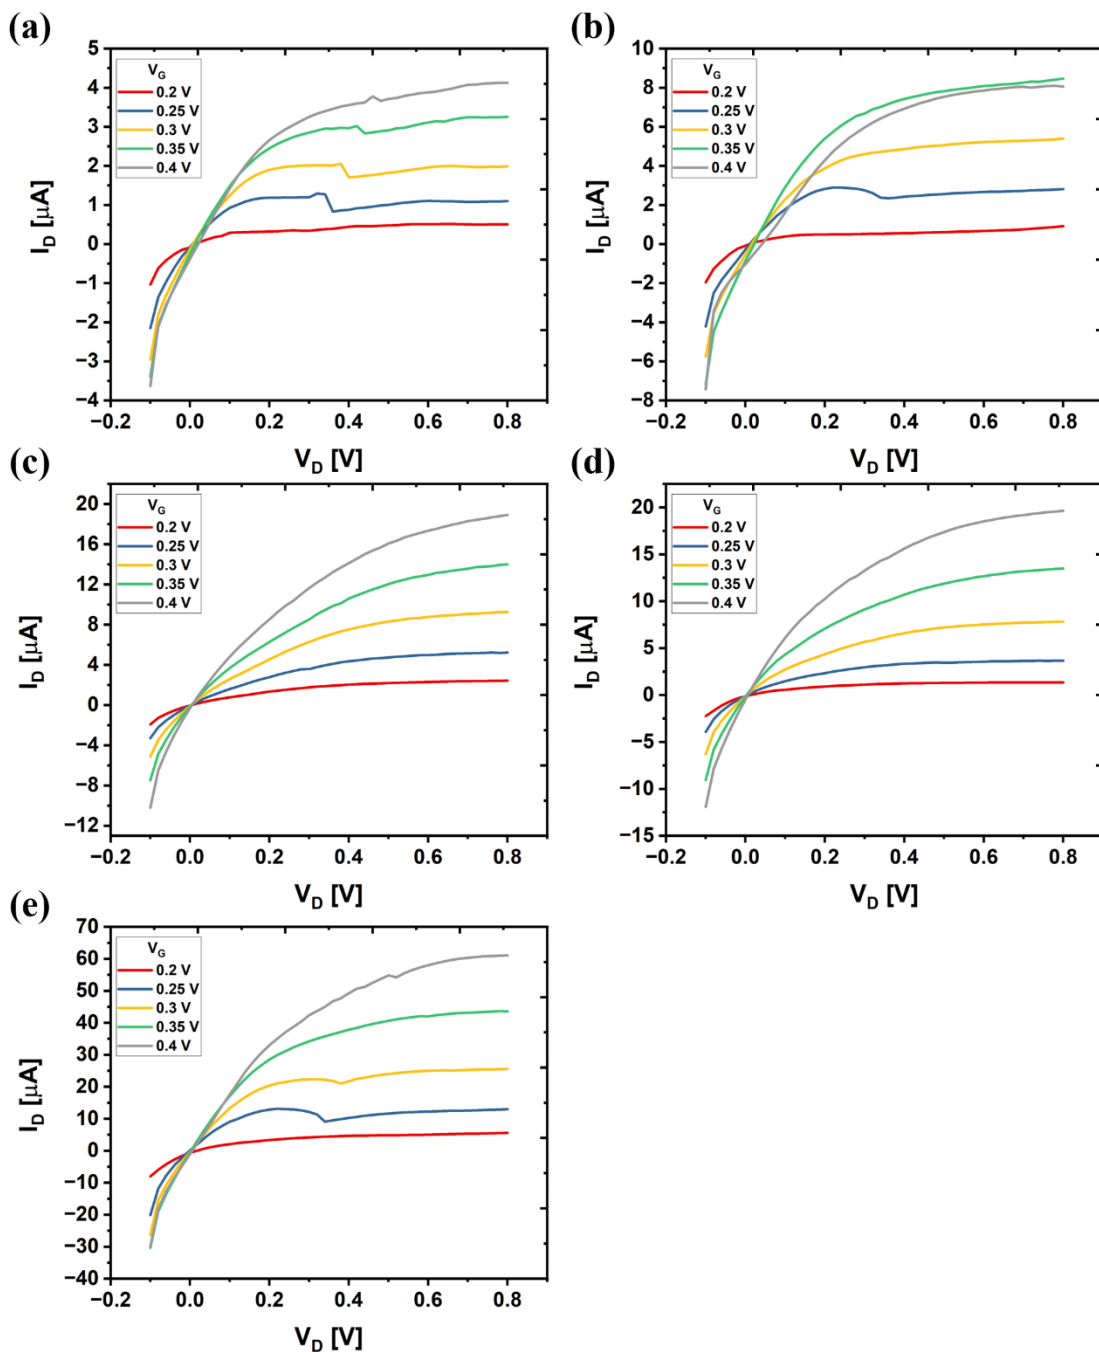

Figure S2. Output characteristics of drop-casted gNDI-Br<sub>2</sub> OECTs measured with a 100 mM NaCl electrolyte and Ag/AgCl gate electrode with a Length (L) of 10  $\mu\text{m}$ , fabricated using different concentrations: (a) 10 mg mL<sup>-1</sup>, (b) 20 mg mL<sup>-1</sup>, (c) 30 mg mL<sup>-1</sup>, (d) 40 mg mL<sup>-1</sup>, and (e) 50 mg mL<sup>-1</sup>.

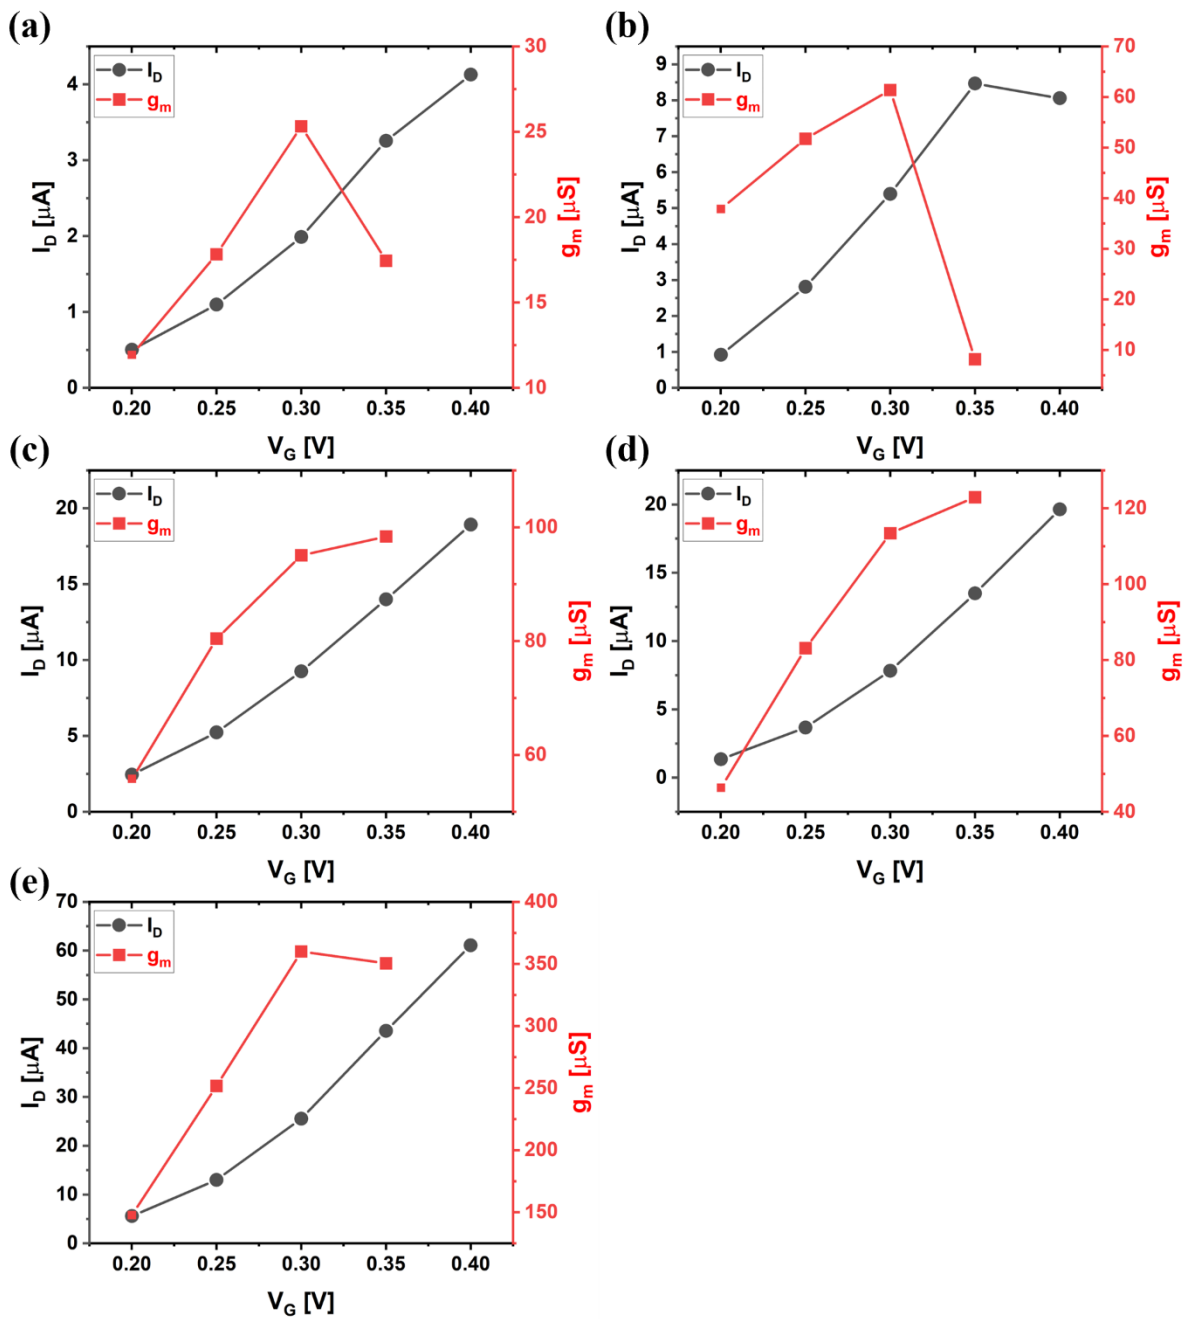

Figure S3. Transfer and transconductance curves of drop-casted gNDI-Br<sub>2</sub> OEETs measured with a 100 mM NaCl electrolyte and Ag/AgCl gate electrode with a length ( $L$ ) of 10 μm, fabricated using different concentrations: (a) 10 mg mL<sup>-1</sup>, (b) 20 mg mL<sup>-1</sup>, (c) 30 mg mL<sup>-1</sup>, (d) 40 mg mL<sup>-1</sup>, and (e) 50 mg mL<sup>-1</sup>.

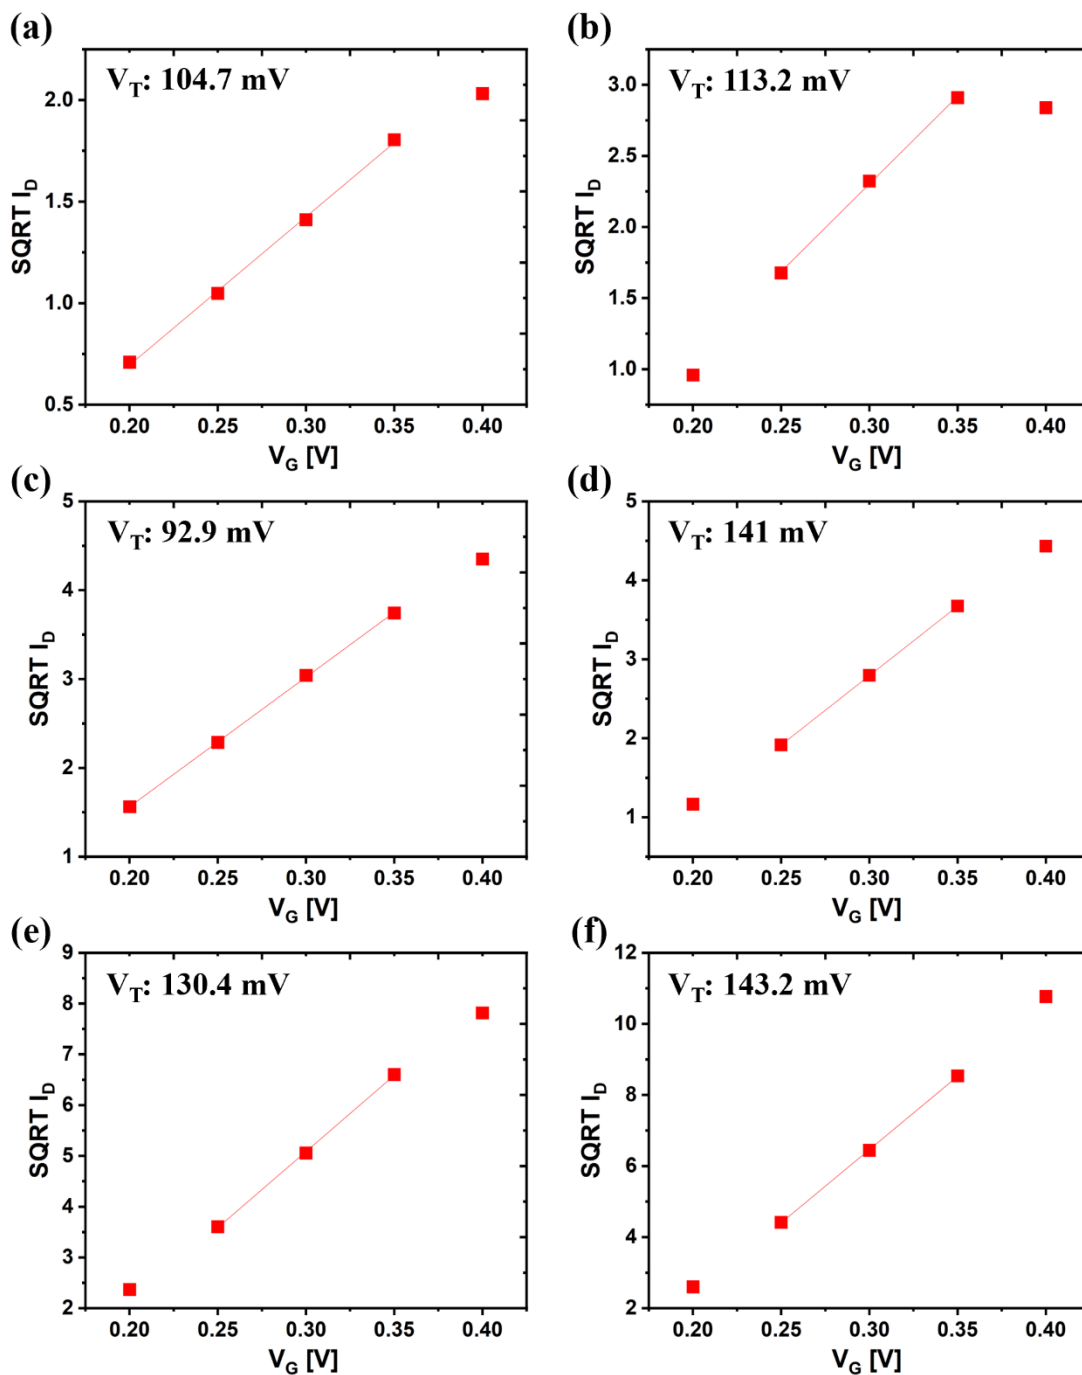

Figure S4. The  $\text{sqrt}(I_D)$  vs  $V_G$  Curves of Drop-casted gNDI-Br<sub>2</sub> OECTs, Measured with a 100 mM NaCl Electrolyte and Ag/AgCl Gate Electrode, Fabricated with a Length (L) of 10  $\mu\text{m}$  Using Different Concentrations and Calculated Threshold Voltages: (a) 10  $\text{mg mL}^{-1}$ , (b) 20  $\text{mg mL}^{-1}$ , (c) 30  $\text{mg mL}^{-1}$ , (d) 40  $\text{mg mL}^{-1}$ , (e) 50  $\text{mg mL}^{-1}$ , and (f) 100  $\text{mg mL}^{-1}$

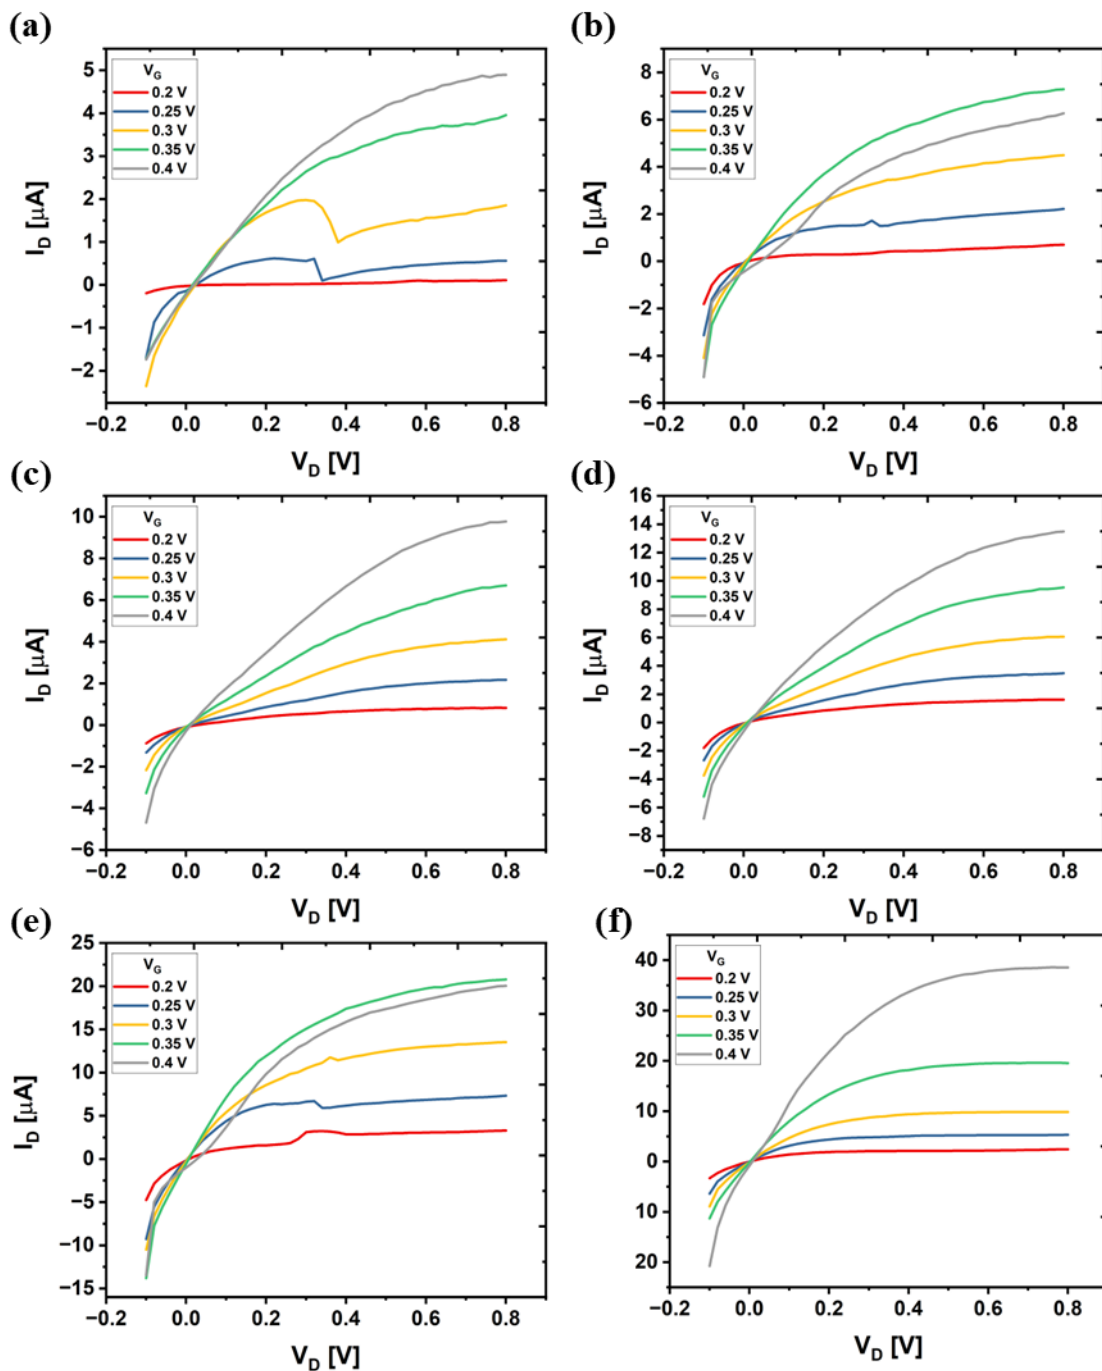

Figure S5. Output characteristics of drop-casted gNDI-Br<sub>2</sub> OECTs with a channel length ( $L$ ) of 20  $\mu\text{m}$ , fabricated using different concentrations: (a) 10  $\text{mg mL}^{-1}$ , (b) 20  $\text{mg mL}^{-1}$ , (c) 30  $\text{mg mL}^{-1}$ , (d) 40  $\text{mg mL}^{-1}$ , (e) 50  $\text{mg mL}^{-1}$ , and (f) 100  $\text{mg mL}^{-1}$ . All measurements were performed using a 100 mM NaCl electrolyte and Ag/AgCl gate electrode

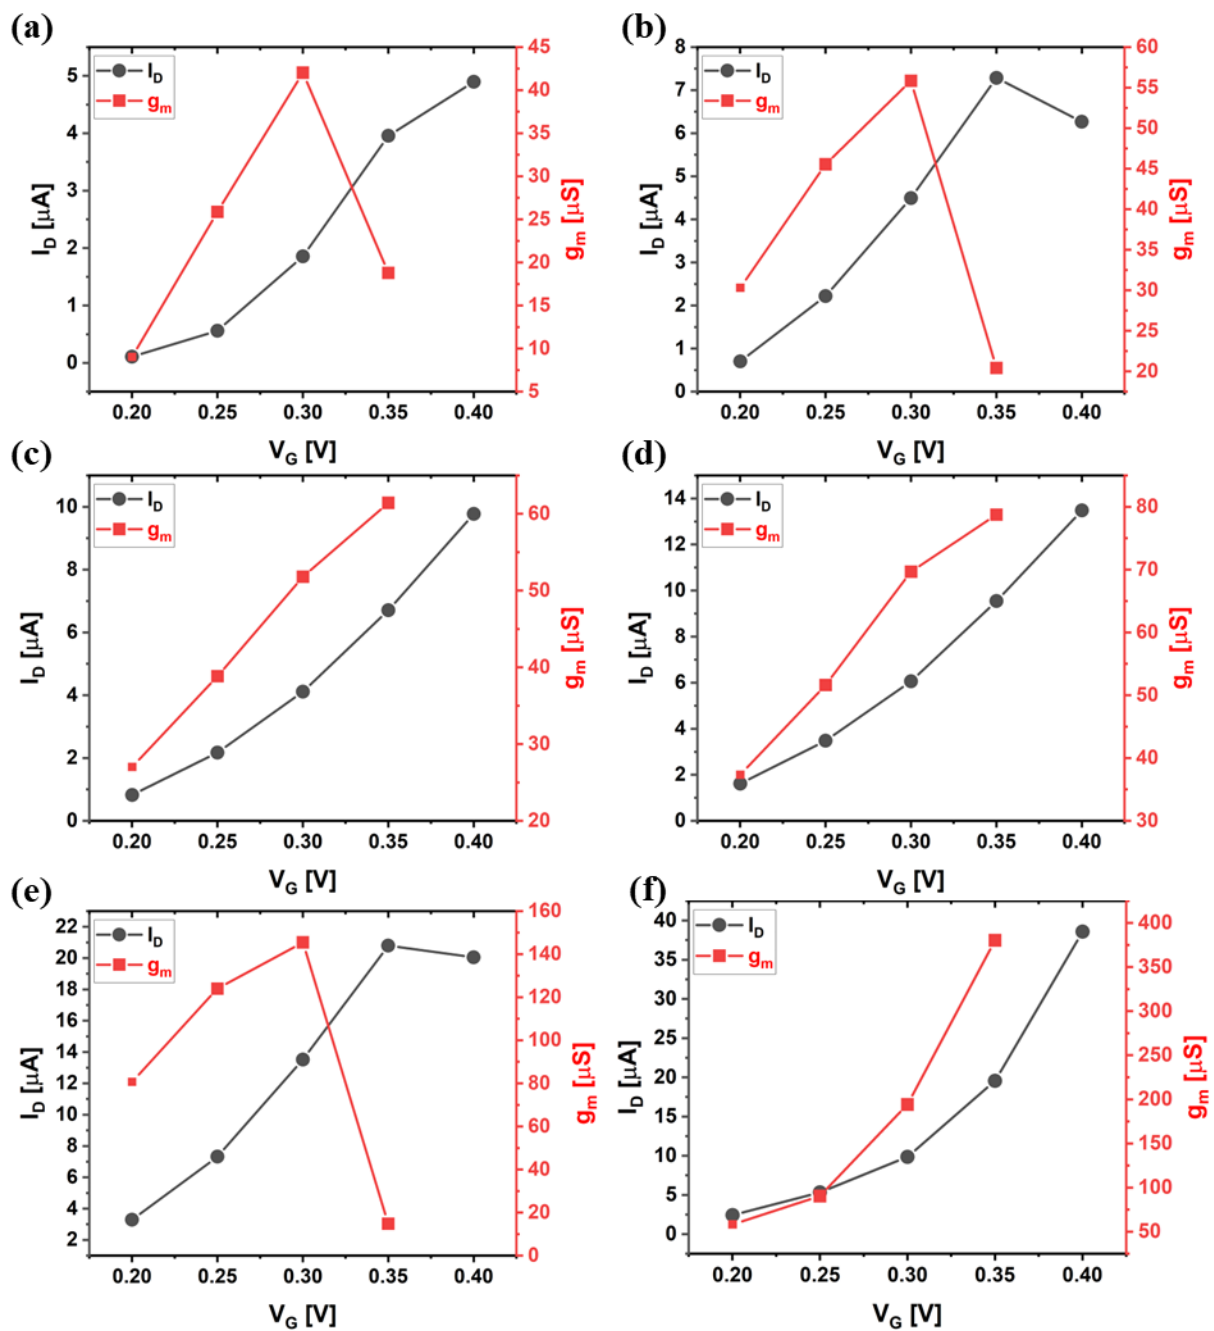

Figure S6. Transfer and transconductance curves of drop-casted gNDI-Br<sub>2</sub> OEETs with a channel length (L) of 20 μm, fabricated using different concentrations: (a) 10 mg mL<sup>-1</sup>, (b) 20 mg mL<sup>-1</sup>, (c) 30 mg mL<sup>-1</sup>, (d) 40 mg mL<sup>-1</sup>, (e) 50 mg mL<sup>-1</sup>, and (f) 100 mg mL<sup>-1</sup>. All measurements were performed using a 100 mM NaCl electrolyte and Ag/AgCl gate electrode.

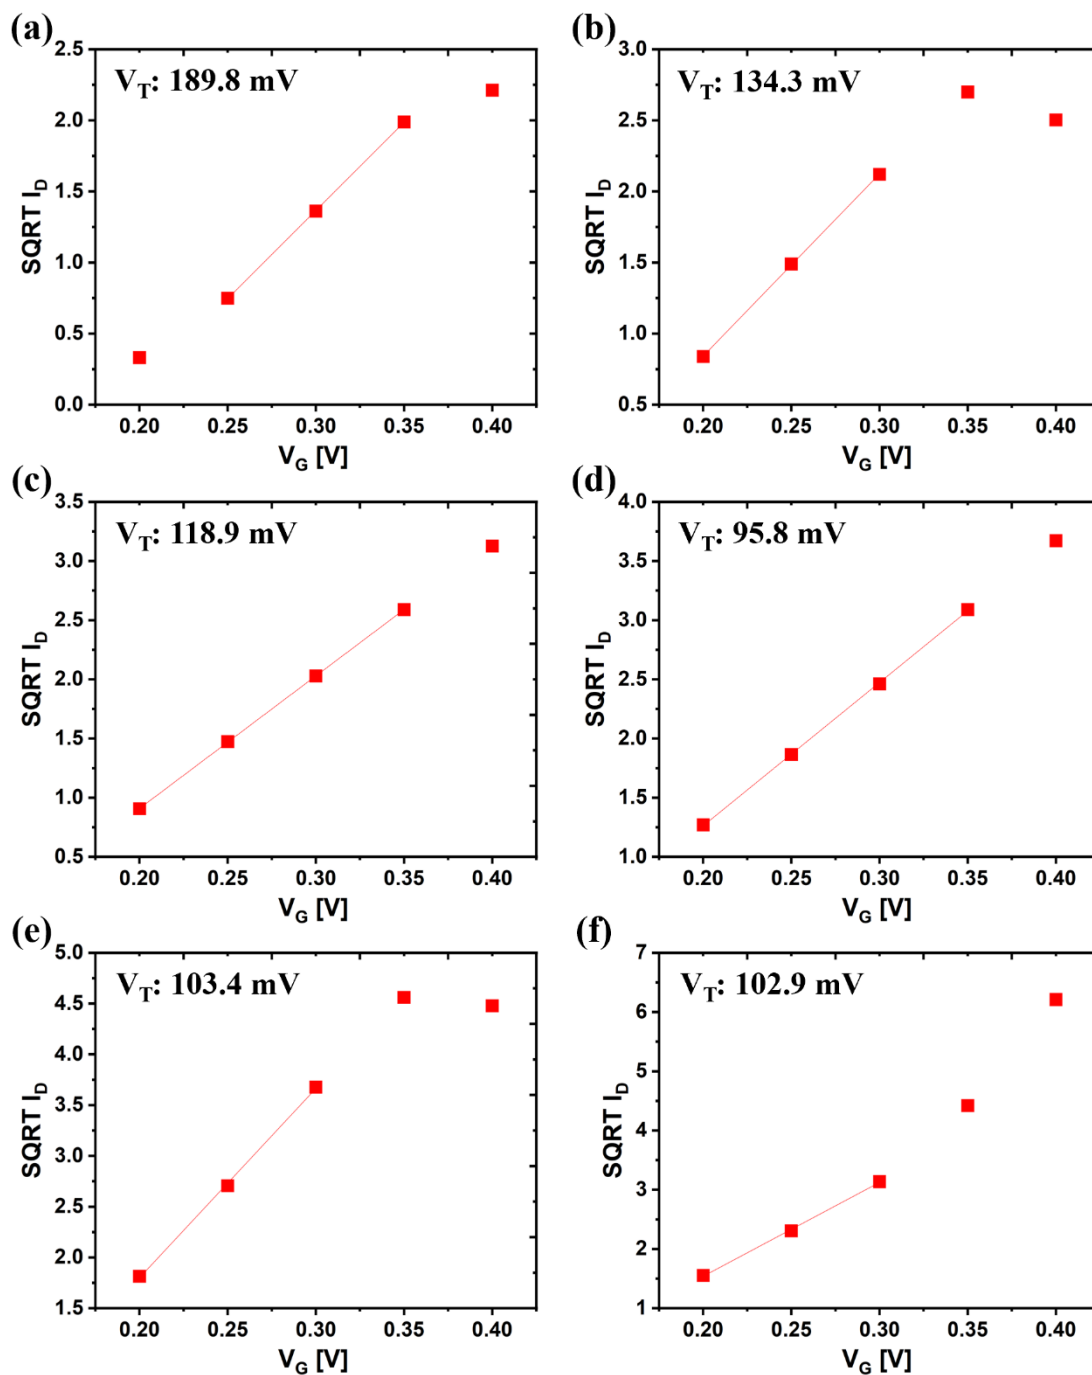

Figure S7. Square root of drain current ( $\text{sqrt}(I_D)$ ) vs  $V_G$  curves of drop-casted gNDI-Br<sub>2</sub> OECTs with a Length ( $L$ ) of 20  $\mu\text{m}$  used for calculating threshold voltages ( $V_T$ ). The devices were fabricated using different concentrations: (a) 10  $\text{mg mL}^{-1}$ , (b) 20  $\text{mg mL}^{-1}$ , (c) 30  $\text{mg mL}^{-1}$ , (d) 40  $\text{mg mL}^{-1}$ , (e) 50  $\text{mg mL}^{-1}$ , and (f) 100  $\text{mg mL}^{-1}$ .

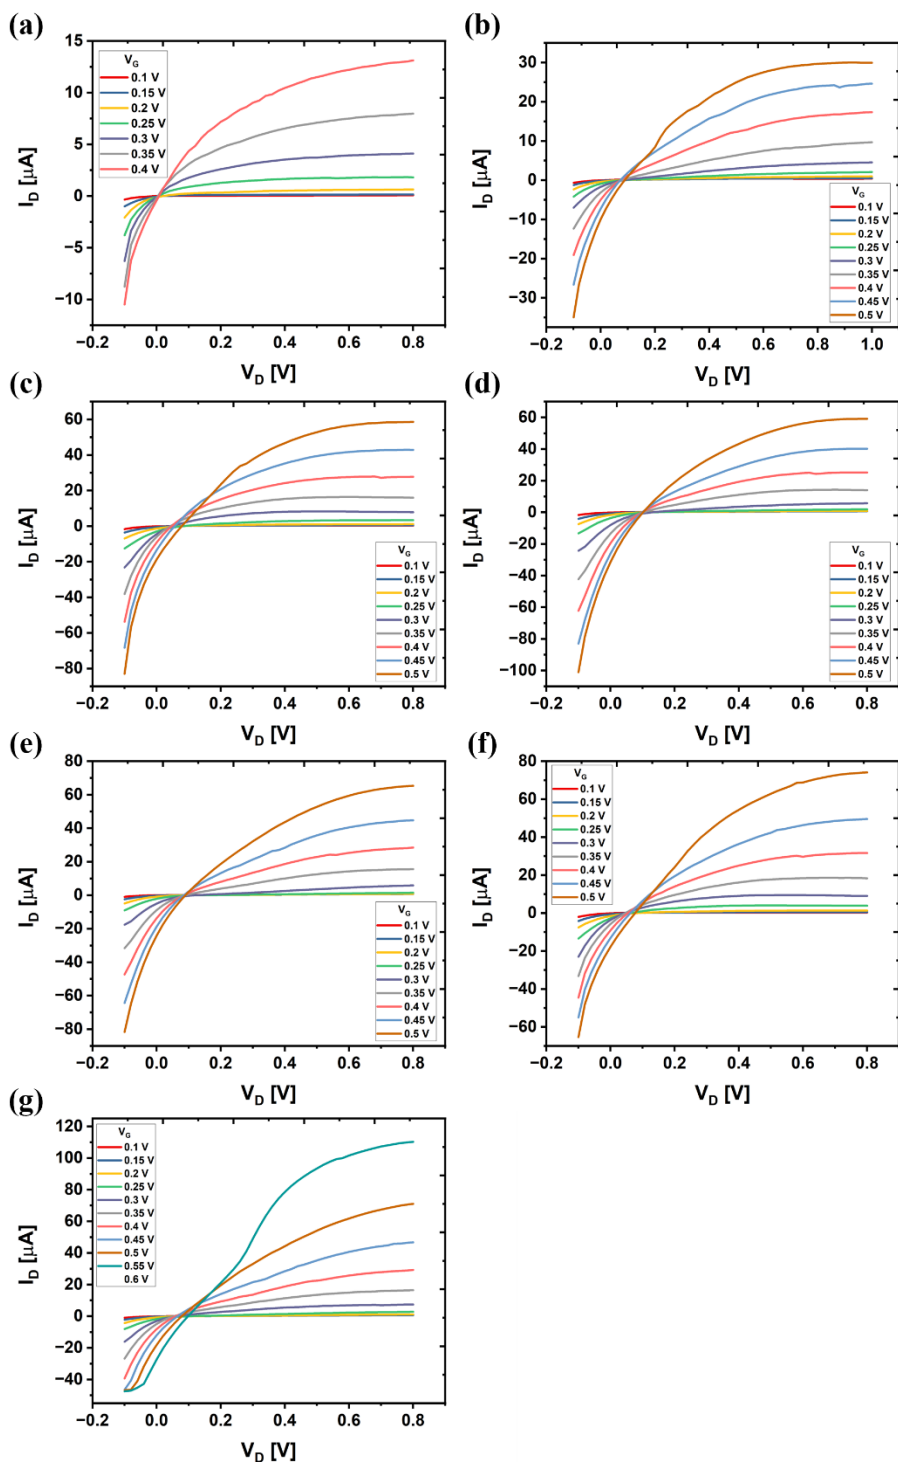

Figure S8. Output Characteristics of Multi-layer Drop-casted gNDI-Br<sub>2</sub> OECTs (50 mg mL<sup>-1</sup>) Measured with a 100 mM NaCl Electrolyte and Ag/AgCl Gate Electrode with a Length (L) of 10 μm: (a) 1 layer, (b) 3 layers, (c) 5 layers, (d) 6 layers, (e) 7 layers, (f) 8 layers, and (g) 9 layers



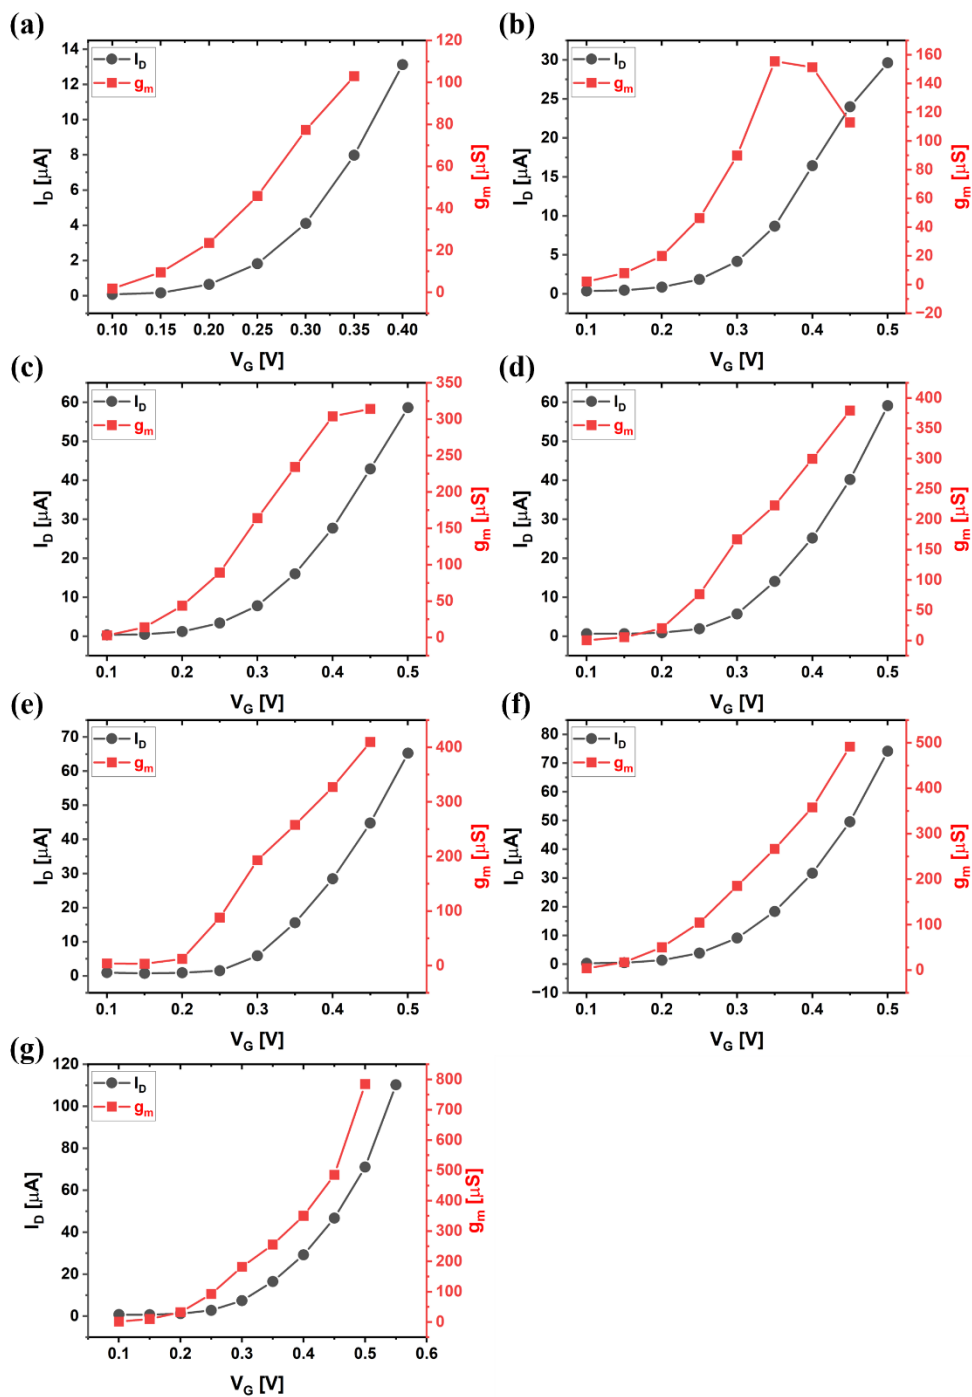

Figure S9. Transfer and Transconductance Curves of Multi-layer Drop-casted gNDI-Br<sub>2</sub> OECTs (50 mg mL<sup>-1</sup>) Measured with a 100 mM NaCl Electrolyte and Ag/AgCl Gate Electrode with a Length (L) of 10  $\mu\text{m}$ : (a) 1 layer, (b) 3 layers, (c) 5 layers, (d) 6 layers, (e) 7 layers, (f) 8 layers, and (g) 9 layers.

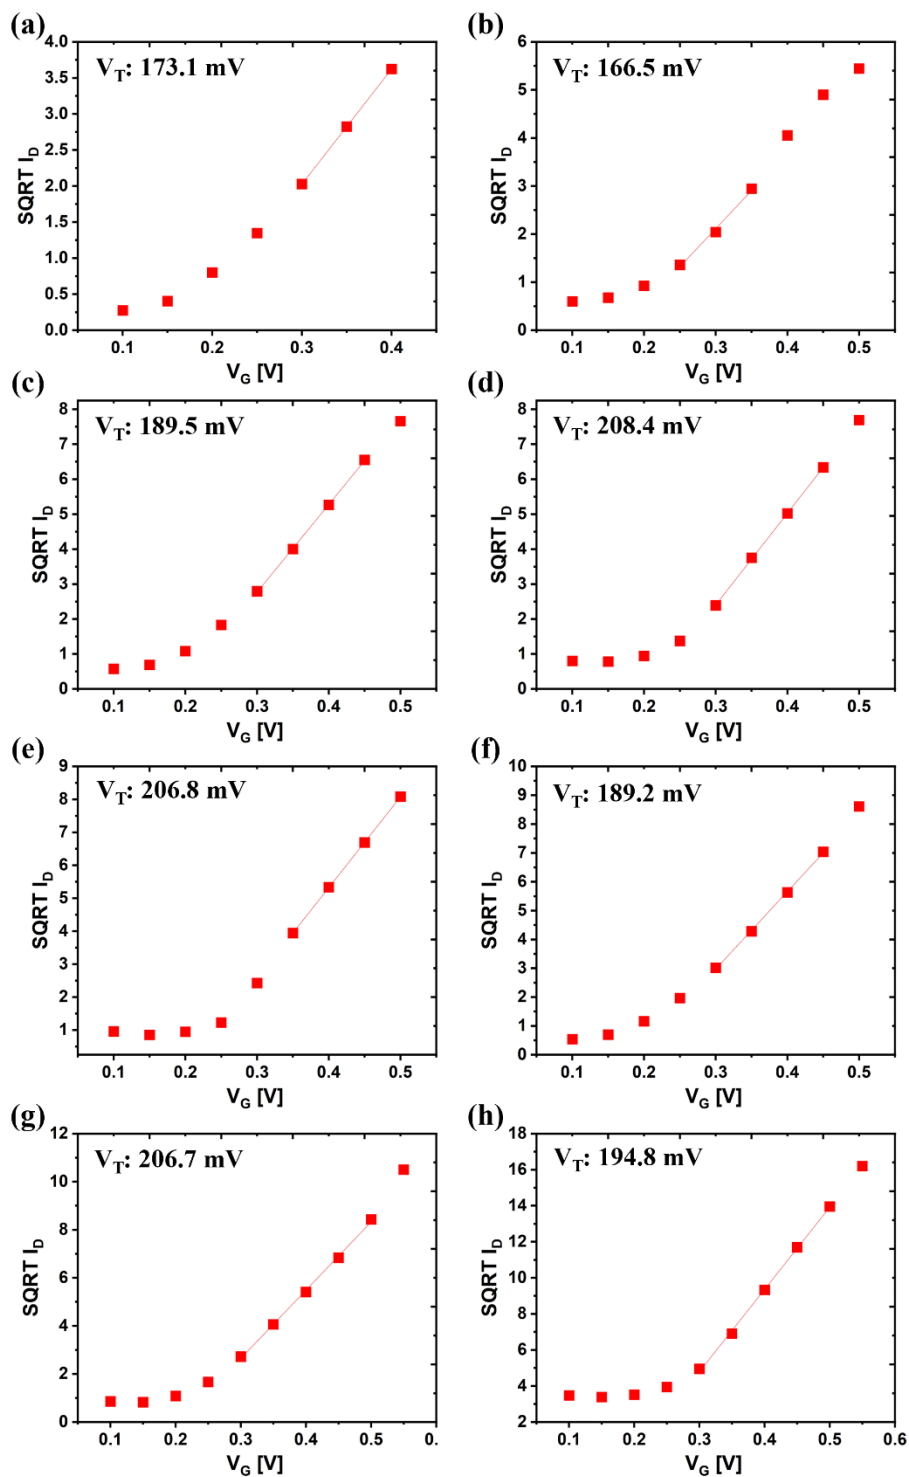

Figure S10. The  $\text{sqrt}(I_D)$  vs  $V_G$  curves of multi-layer drop-casted gNDI-Br<sub>2</sub> OEETs (50 mg mL<sup>-1</sup>) with  $L$  of 10  $\mu\text{m}$ : (a) 1 layer, (b) 3 layers, (c) 5 layers, (d) 6 layers, (e) 7 layers, (f) 8 layers, (g) 9 layers, and (h) 10 layers. All devices were measured with a 100 mM NaCl electrolyte and Ag/AgCl gate electrode.

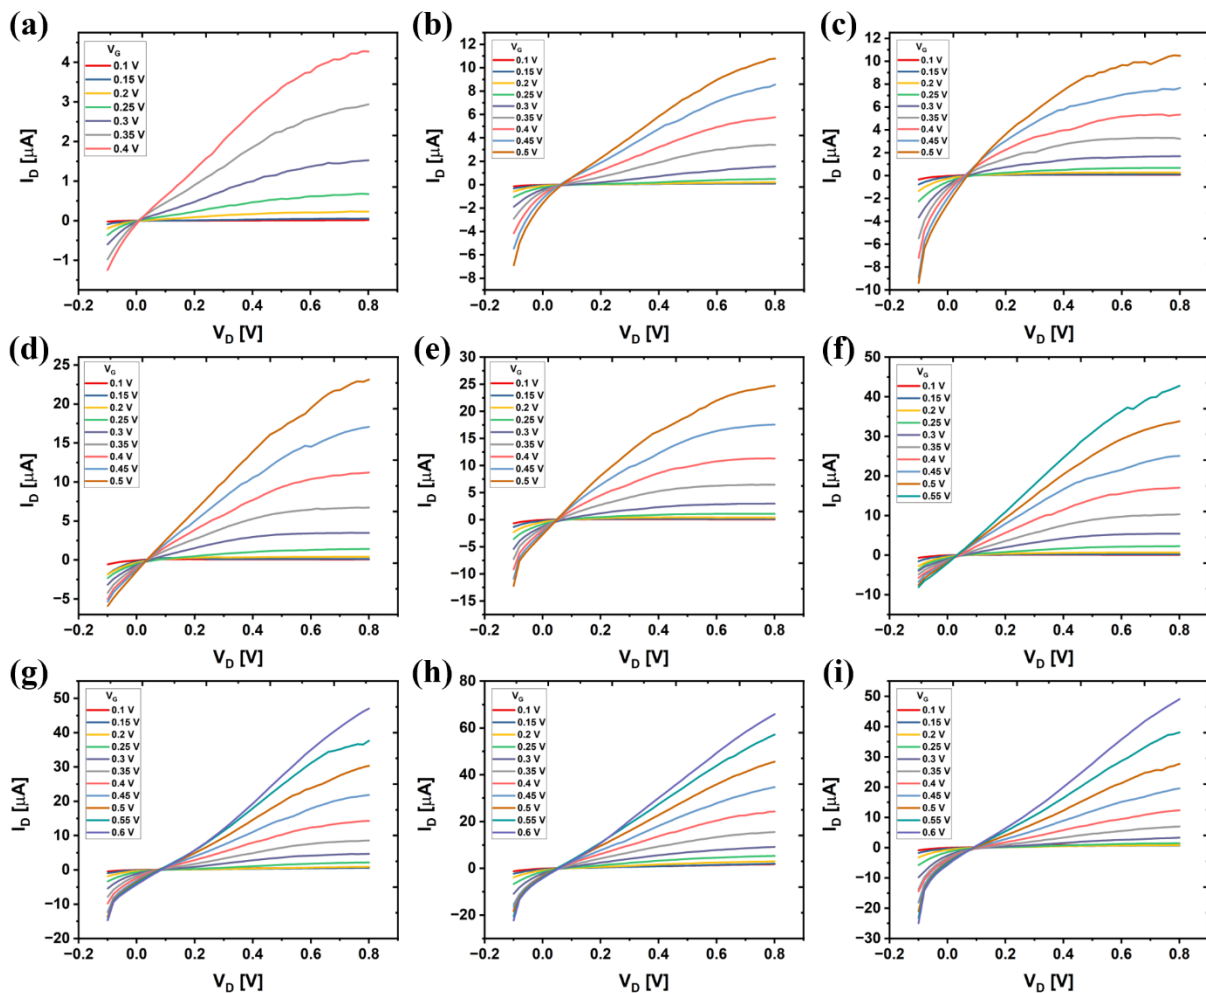

Figure S11. Output characteristics of multi-layer drop-casted gNDI-Br<sub>2</sub> OECTs (50 mg mL<sup>-1</sup>) Measured with a 100 mM NaCl Electrolyte and Ag/AgCl Gate Electrode with a Length (L) of 20  $\mu$ m: (a) 1 layer, (b) 2 layers, (c) 3 layers, (d) 4 layers, (e) 5 layers, (f) 6 layers, (g) 7 layers, (h) 8 layers, and (i) 9 layers.

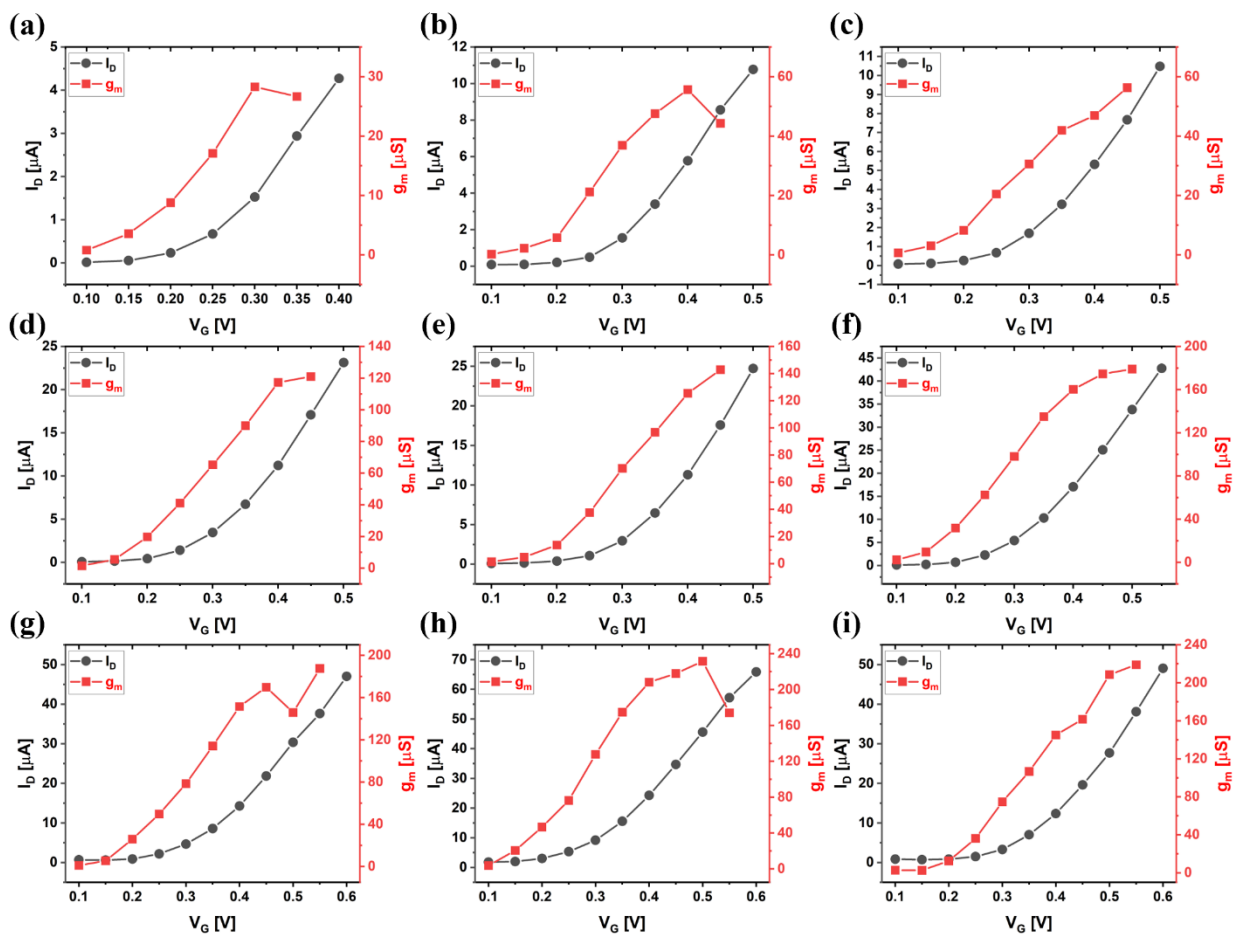

Figure S12. Transfer and Transconductance Curves of Multi-layer Drop-casted gNDI-Br<sub>2</sub> OECTs (50 mg mL<sup>-1</sup>) Measured with a 100 mM NaCl Electrolyte and Ag/AgCl Gate Electrode with a Length (L) of 20 μm: (a) 1 layer, (b) 2 layers, (c) 3 layers, (d) 4 layers, (e) 5 layers, (f) 6 layers, (g) 7 layers, (h) 8 layers, and (i) 9 layers

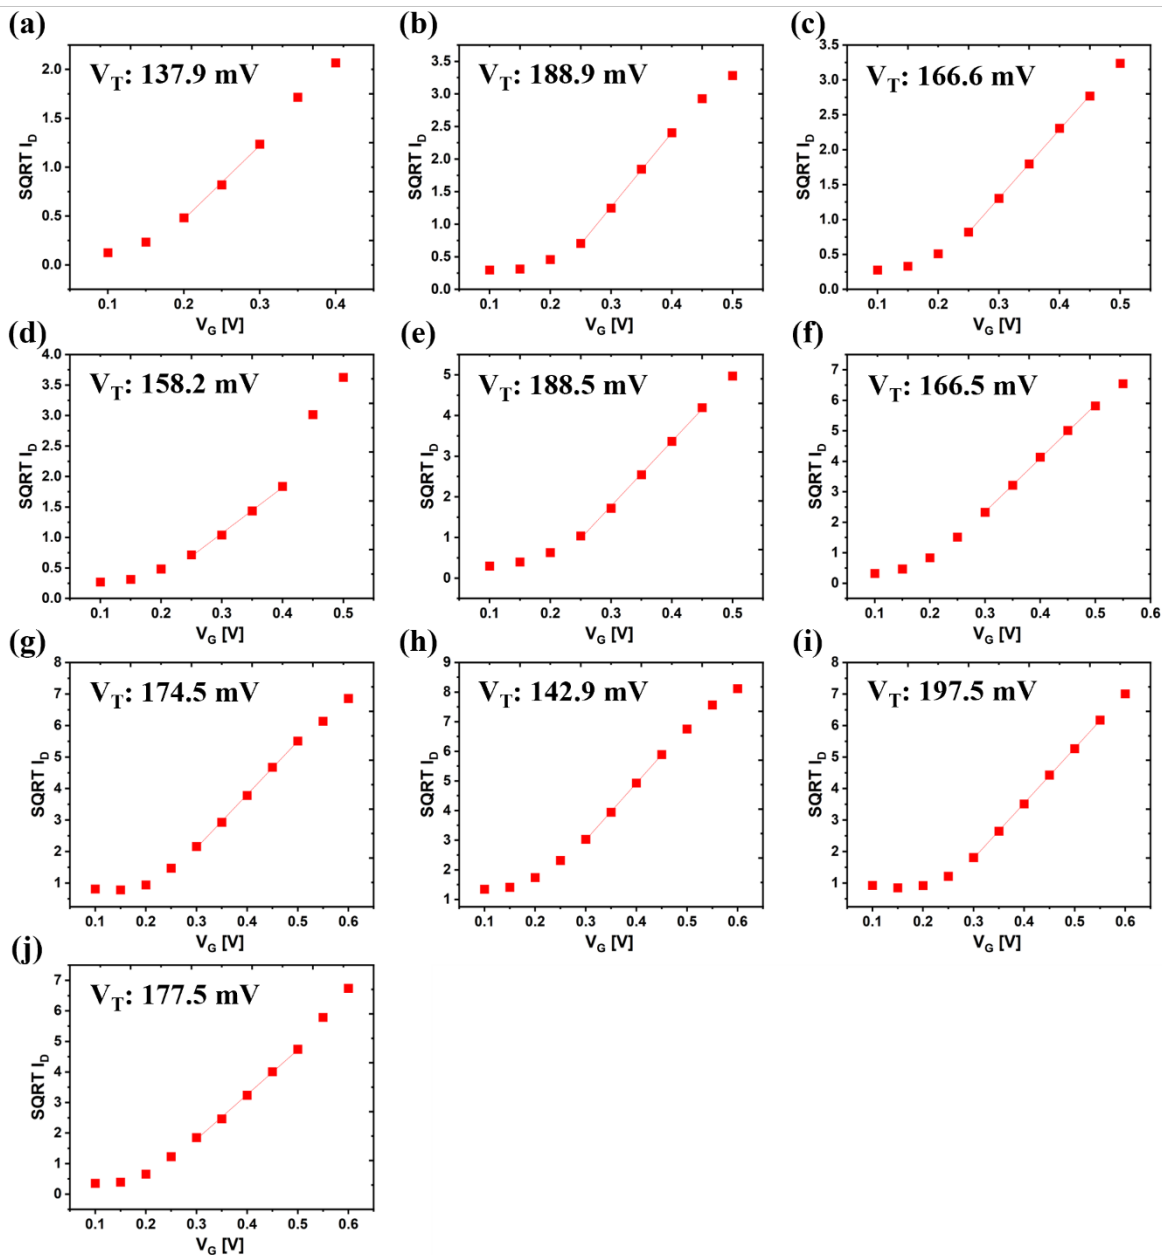

Figure S13. The  $\text{sqrt}(I_D)$  vs  $V_G$  Curves of Multi-layer Drop-casted gNDI-Br<sub>2</sub> OECTs ( $50 \text{ mg mL}^{-1}$ ), Measured with a  $100 \text{ mM NaCl}$  Electrolyte and Ag/AgCl Gate Electrode, Fabricated with a Length ( $L$ ) of  $20 \text{ }\mu\text{m}$ : (a) 1 layer, (b) 2 layers, (c) 3 layers, (d) 4 layers, (e) 5 layers, (f) 6 layers, (g) 7 layers, (h) 8 layers, (i) 9 layers, and (j) 10 layers

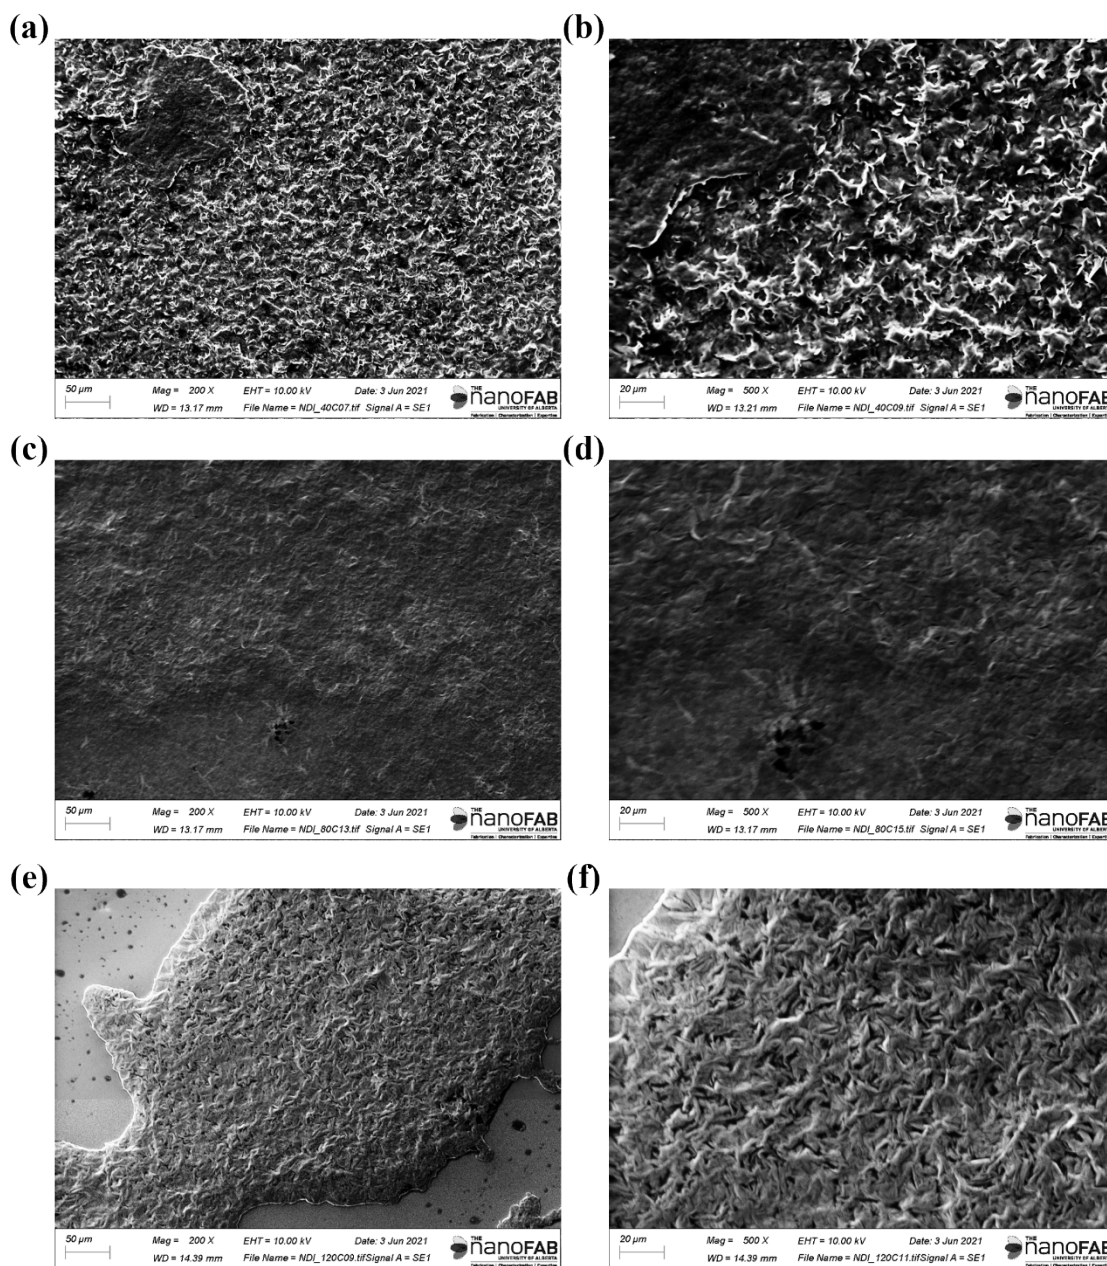

Figure S14. Scanning Electron Microscopy of Drop-casted gNDI-Br<sub>2</sub> (50 mg mL<sup>-1</sup>) Thin Film onto Silicon Wafer: (a), (b) After Annealing at 40°C for 24 Hours, (c), (d) After Annealing at 80°C for 24 Hours, (e), (f) After Annealing at 120°C for 24 Hours.

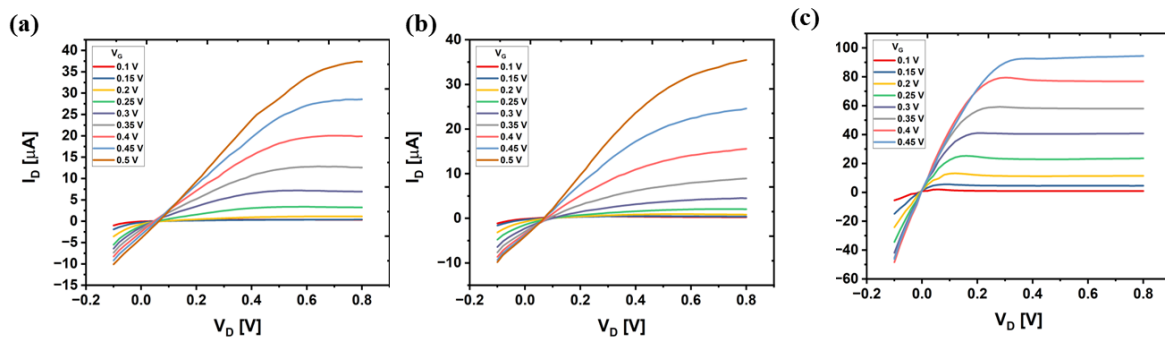

Figure S15. Output characteristics of OECTs fabricated on Si/SiO<sub>2</sub> substrates using 1-layer drop-casted 50 mg mL<sup>-1</sup> gNDI-Br<sub>2</sub> solution with  $L = 10 \mu\text{m}$  and annealed at (a) 40°C, (b) 80°C, and (c) 120°C for 24 hours.

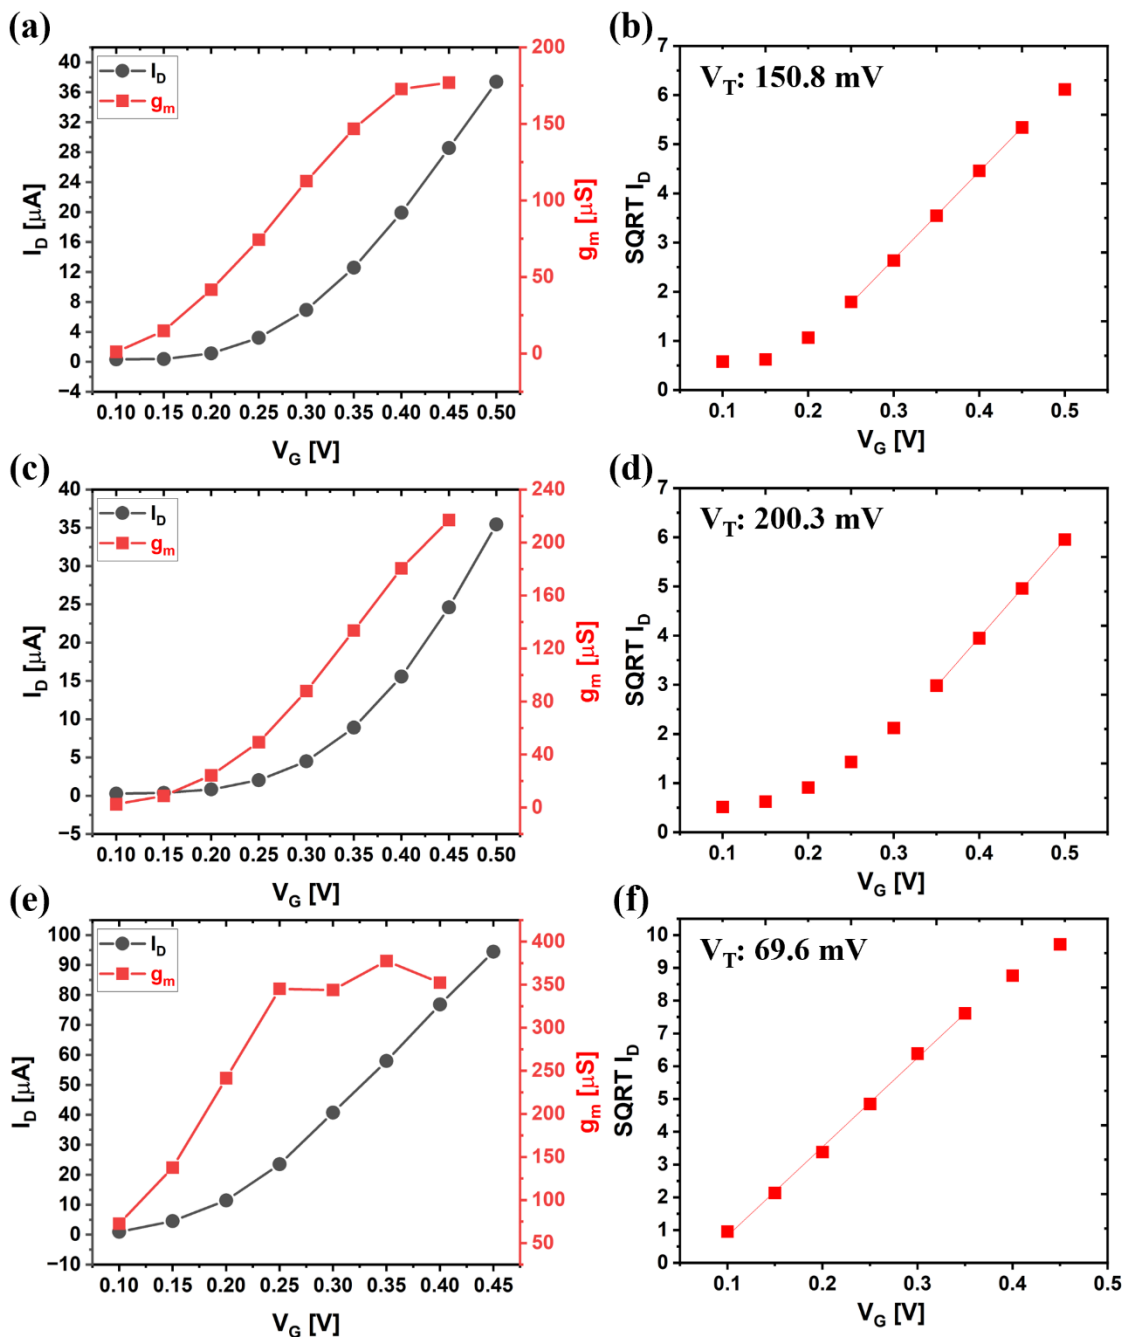

Figure S16. Transfer and Transconductance Curves of Drop-casted gNDI-Br<sub>2</sub> OECTs (50 mg mL<sup>-1</sup>) Measured with a 100 mM NaCl Electrolyte and Ag/AgCl Gate Electrode with a Length (L) of 10  $\mu$ m: Annealed at (a) 40°C, (c) 80°C, and (e) 120°C. The sqrt ( $I_D$ ) vs  $V_G$  Curves of Drop-casted gNDI-Br<sub>2</sub> OECTs (50 mg/mL) Measured with a 100 mM NaCl Electrolyte and Ag/AgCl Gate Electrode with a L of 10  $\mu$ m: Annealed at (b) 40°C, (d) 80°C, and (f) 120°C



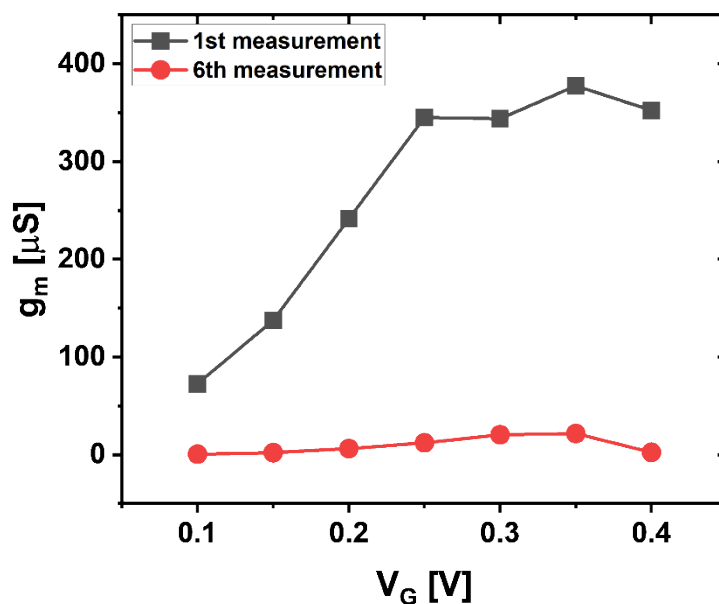

Figure S17. Transconductance curves of drop-casted gNDI-Br<sub>2</sub> OECT (50 mg mL<sup>-1</sup>, L = 10  $\mu$ m) annealed at 120°C measured with a 100 mM NaCl electrolyte and Ag/AgCl gate electrode calculated from the 1<sup>st</sup> and the 6<sup>th</sup> consecutive electrical measurements on the same device, showing a  $g_{m,max}$  reduction from 337.5  $\mu$ S to 31.7  $\mu$ S.
